# Supplementary material
Source: PubMed Central journal article supplement (PMC6391591)

YMTHE, Volume 27

## Supplemental Information

### ***DANCR* Promotes Metastasis and Proliferation in Bladder Cancer Cells by Enhancing IL-11-STAT3 Signaling and CCND1 Expression**

Ziyue Chen, Xu Chen, Ruihui Xie, Ming Huang, Wen Dong, Jinli Han, Jingtong Zhang, Qianghua Zhou, Hui Li, Jian Huang, and Tianxin Lin

## Supplementary figure

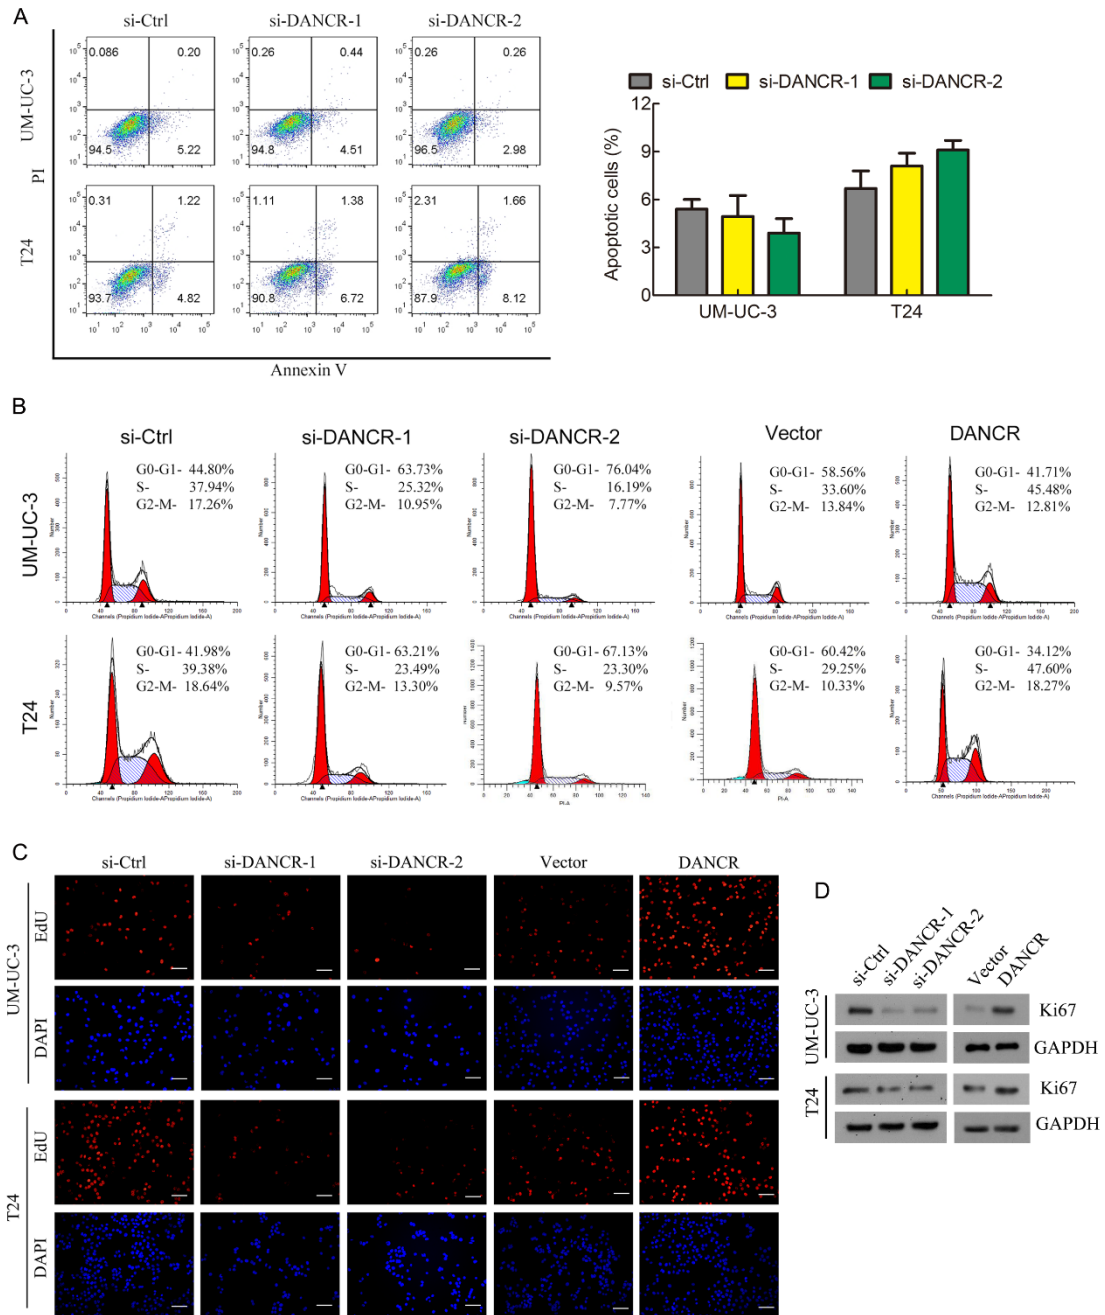

**Figure S1. *DANCR* enhances the proliferation of bladder cancer cells *in vitro***

(A) The apoptosis analysis of *DANCR*-knockdown and control cells was performed after 48h transfection. The histogram shows the percentage (%) of apoptotic cells. (B) Representative images of flow cytometric analysis of T24 and UM-UC-3 cells transfected with *DANCR* siRNA or stably overexpressing *DANCR* compared with the corresponding control cells, as indicated. (C) Representative images of EdU assay measurement of the proportion of the cell population in the S phase. Blue, nucleus;

red, S-phase cells. Scale bars: white, 100  $\mu\text{m}$ . **(D)** The expression of Ki67 was detected by western blotting. GAPDH was used as the internal control.

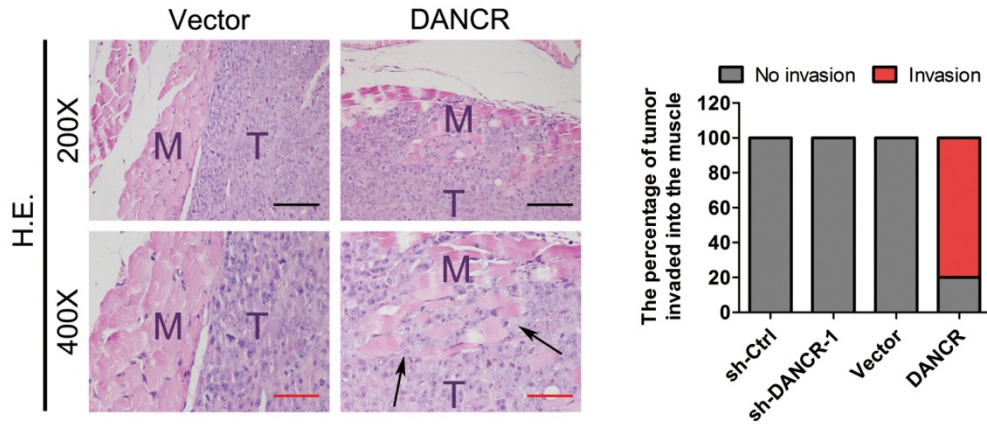

**Figure S2. Representative images showing that tumors invaded into the surrounding muscle in *DANCR* overexpression groups and respective controls.** M represents muscle and T represents tumor. The arrow indicates the invasive tissues. Histogram shows the percentage of the tumor invade into the surrounding muscle in *DANCR* knockdown or overexpression groups and the control group. Scale bars: red, 50  $\mu\text{m}$ . black, 200  $\mu\text{m}$ .

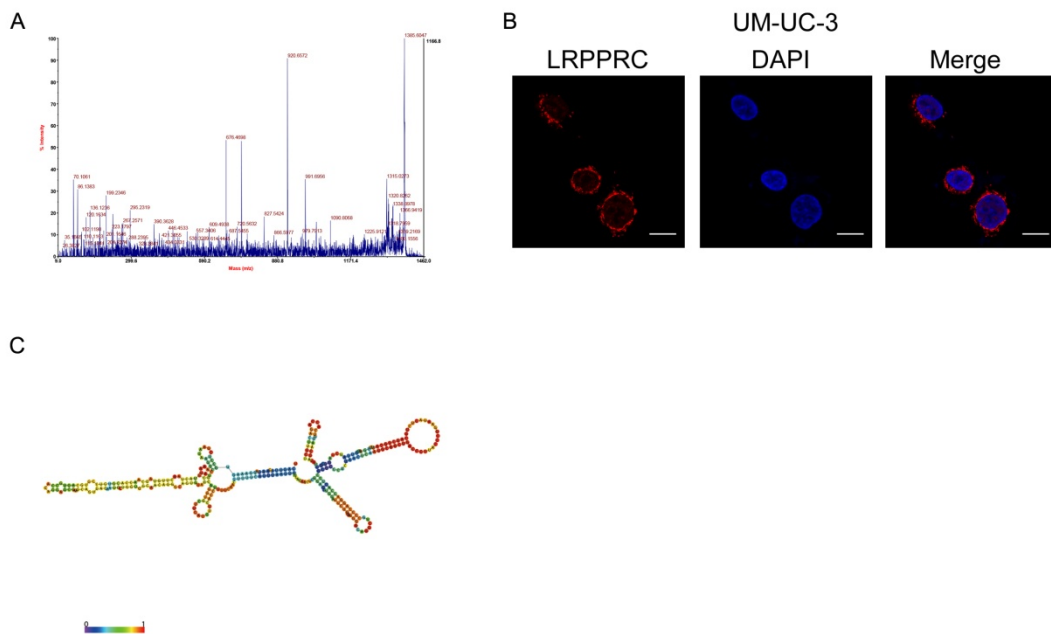

**Figure S3. *DANCR* directly interacts with LRPPRC to play key roles in bladder cancer**

(A) MS/MS profiles of target band (corresponding peptide sequences of LRPPRC) retrieved by *DANCR*. (B) The subcellular distribution of LRPPRC was visualized by immunofluorescence in UM-UC-3 cells. Scale bars: white, 10  $\mu$ m. (C) Prediction of 350–670 nt *DANCR* structure was based on minimum free energy (MFE) and partition function (<http://rna.tbi.univie.ac.at/>).

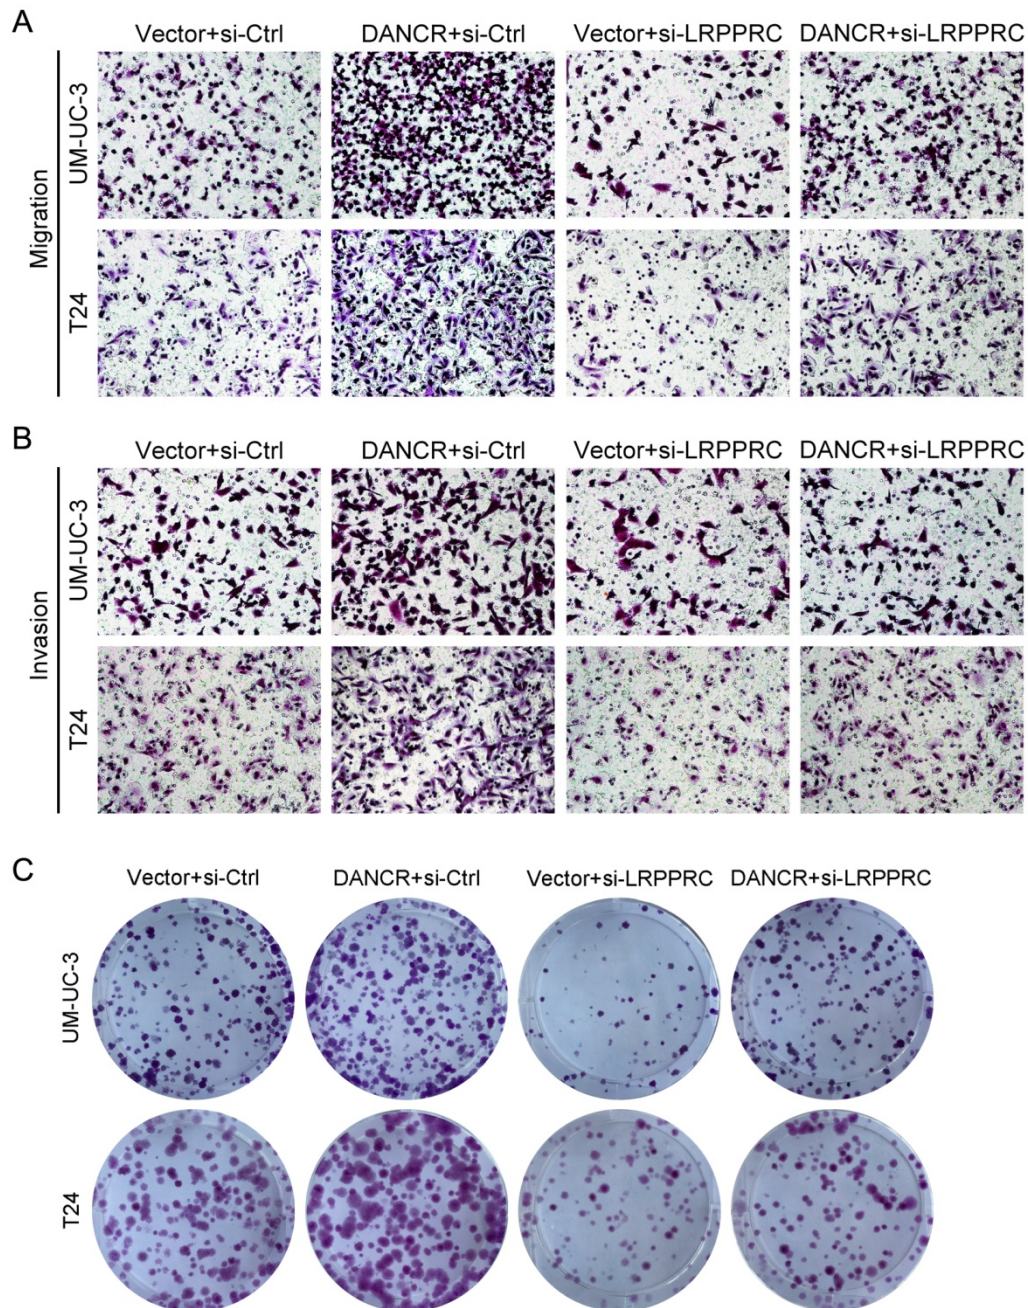

**Figure S4. *DANCR* regulates metastasis and proliferation of BCa cells in an LRPPRC-dependent manner.**



(A, B) Representative images of migration and invasion assays using *DANCR* overexpression or control cells combined with LRPPRC knockdown. (C) Representative images of colony formation were analyzed using *DANCR* overexpression or control cells combined with LRPPRC knockdown.

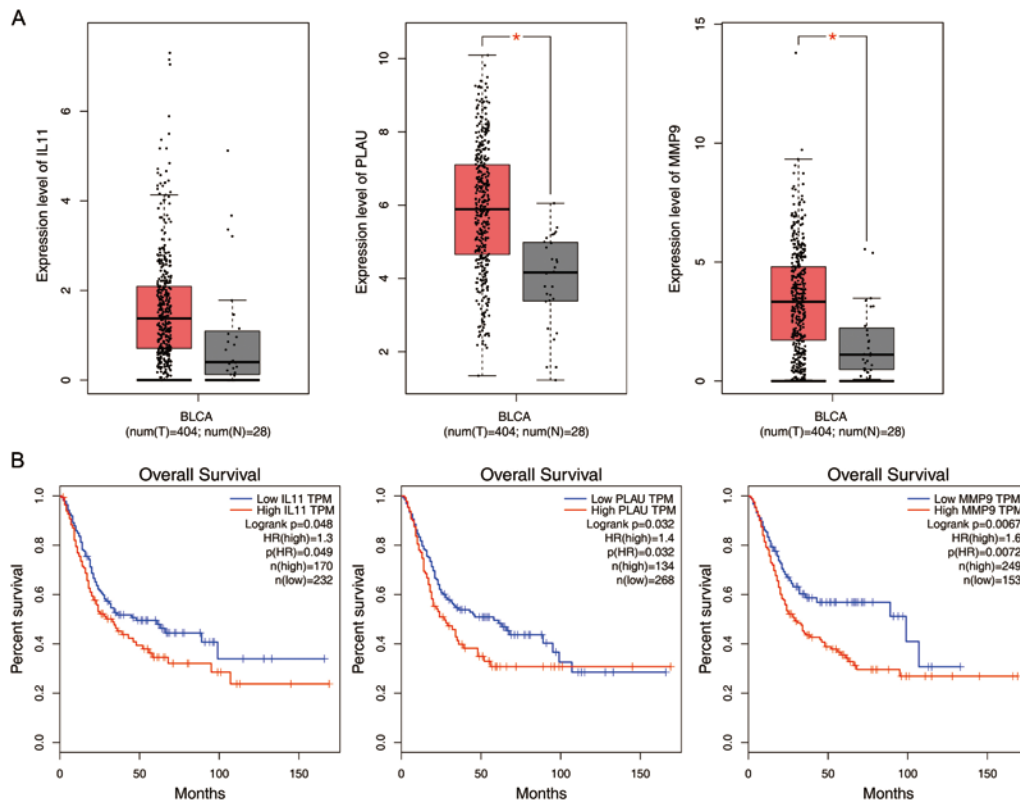

**Figure S5. IL-11, PLAU and MMP9 were upregulated in BCa tissues and correlated positively with poor overall survival in BCa from TCG) cohort.**

(A) The expression of IL-11, PLAU and MMP9 from the TCGA databases was analyzed in BCa patients. (B) Kaplan-Meier survival analysis of OS in BCa patients with expression profile of IL-11-high vs IL-11-low in TCGA databases. The similar analysis was performed in PLAU and MMP9. The data was obtained from GEPIA (<http://gepia.cancer-pku.cn/index.html>). The log-rank (Mantel-Cox) test was used to calculate p-values.  $p < 0.05$  was considered statistically significant.

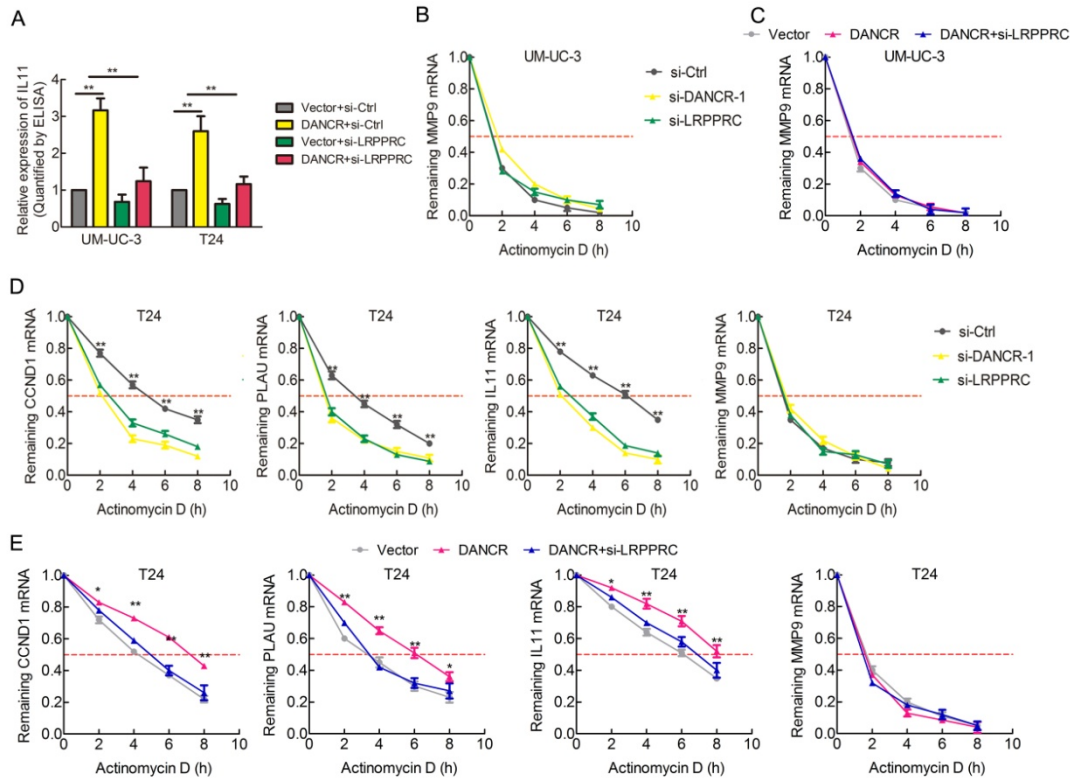

**Figure S6. DANCR regulates mRNA stability via guiding LRPPRC to target genes.**

(A) The secreted IL-11 expression was detected in *DANCR* overexpression or control cells combined with LRPPRC knockdown using ELISA. (B, D) UM-UC-3 and T24 cells expressing control siRNA, *DANCR* siRNA-1 or LRPPRC siRNA were treated with actinomycin D (5  $\mu$ g/mL) for the indicated periods of time. (C, E) UM-UC-3 and T24 cells stably expressing control, *DANCR* or *DANCR*+LRPPRC siRNA were treated with actinomycin D (5  $\mu$ g/mL) for the indicated periods of time. Total RNA was purified and then analyzed using qRT-PCR to examine the mRNA half-life of *CCND1*, *PLAU*, *IL11* and *MMP9*. \* $p < 0.05$ , \*\* $p < 0.01$ .

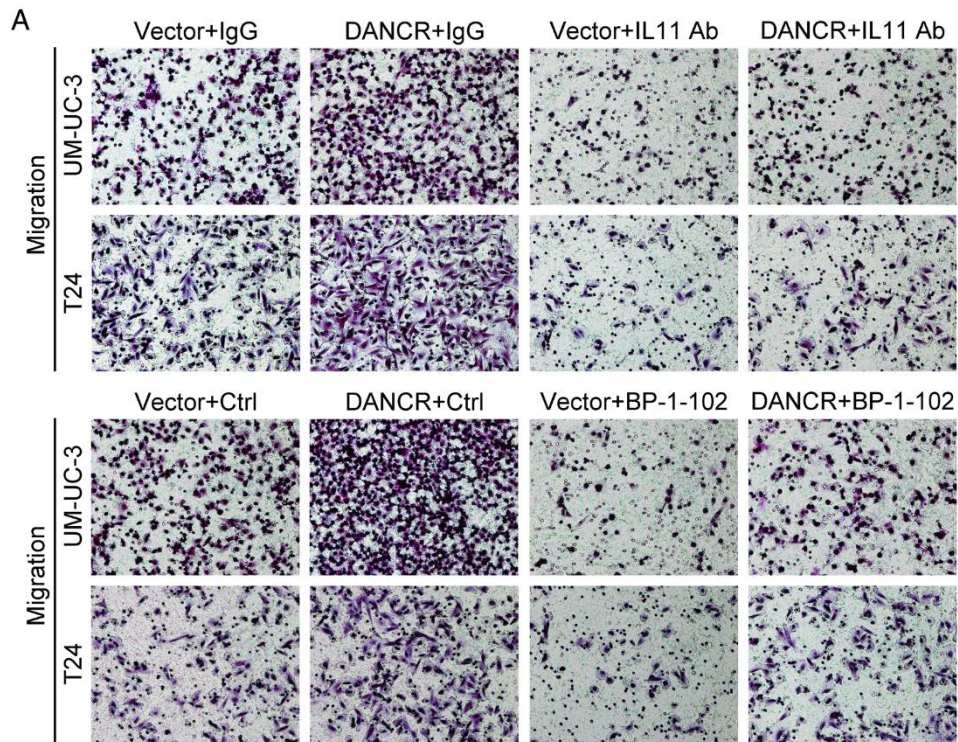

**Figure S7. *DANCR* regulates metastasis of BCa cells in an IL-11-STAT3 signaling pathway-dependent manner.**

(A) Representative images of migration and invasion assays using *DANCR* overexpression or control cells combined with anti-IL-11 antibody or STAT3 inhibitor (BP-1-102).

**Supplementary Table 1. Correlation between *DANCR* expression and clinicopathological characteristics of bladder cancer patients.**

| Characteristic         | Patient frequency | <i>DANCR</i> |      | Pearson<br>Chi-square | <i>p</i> value   |
|------------------------|-------------------|--------------|------|-----------------------|------------------|
|                        |                   | Low          | High |                       |                  |
| Total                  | 120               | 60           | 60   |                       |                  |
| Gender                 |                   |              |      |                       |                  |
| Male                   | 94(78.3%)         | 47           | 47   | 0.000                 | 1.000            |
| Female                 | 26(21.7%)         | 13           | 13   |                       |                  |
| Age                    |                   |              |      |                       |                  |
| ≤65                    | 67(55.8%)         | 39           | 28   | 4.089                 | <b>0.043</b>     |
| >65                    | 53(44.2%)         | 21           | 32   |                       |                  |
| Tumor number           |                   |              |      |                       |                  |
| Single                 | 70(58.3%)         | 33           | 37   | 0.730                 | 0.393            |
| Multiple               | 50(41.7%)         | 27           | 23   |                       |                  |
| Tumor size             |                   |              |      |                       |                  |
| ≤3cm                   | 53(44.2%)         | 28           | 25   | 0.304                 | 0.581            |
| >3cm                   | 67(55.8%)         | 32           | 35   |                       |                  |
| Pathologic tumor stage |                   |              |      |                       |                  |
| Ta-1                   | 55(45.8%)         | 44           | 11   | 36.554                | <b>&lt;0.001</b> |
| T2-4                   | 65(54.2%)         | 16           | 49   |                       |                  |
| Pathologic tumor grade |                   |              |      |                       |                  |
| Low                    | 23(19.2%)         | 16           | 7    | 4.357                 | <b>0.037</b>     |
| High                   | 97(80.8%)         | 44           | 53   |                       |                  |
| Pathologic L.N. status |                   |              |      |                       |                  |
| N(-)                   | 89(74.2%)         | 54           | 35   | 15.701                | <b>&lt;0.001</b> |
| N(+)                   | 31(25.8%)         | 6            | 25   |                       |                  |



**Supplemental table 2** Univariate and multivariate analysis of factors associated with disease-free survival in bladder cancer.

| Variable                       | Univariate |             |              | Multivariate |             |          |
|--------------------------------|------------|-------------|--------------|--------------|-------------|----------|
|                                | HR         | 95% CI      | <i>p</i>     | HR           | 95% CI      | <i>p</i> |
| Age, years (>65/≤65)           | 1.197      | 0.681–2.105 | 0.532        |              |             | NA       |
| Gender (female/male)           | 0.458      | 0.195–1.076 | 0.073        |              |             | NA       |
| Histological grade (High/Low)  | 1.480      | 0.714–3.067 | 0.292        |              |             | NA       |
| Tumor stage (T2–T4/Ta–T1)      | 2.567      | 1.409–4.675 | <b>0.002</b> | 1.428        | 0.626–3.255 | 0.397    |
| Nodal metastasis (N1–N2/N0)    | 2.420      | 1.343–4.361 | <b>0.003</b> | 1.567        | 0.788–3.116 | 0.200    |
| Tumor size (>3 cm/≤ 3 cm)      | 1.264      | 0.719–1.264 | 0.415        |              |             | NA       |
| Tumor number (multiple/single) | 0.829      | 0.465–1.478 | 0.525        |              |             | NA       |
| <i>DANCR</i> (high/low)        | 2.642      | 1.468–4.754 | <b>0.001</b> | 1.879        | 0.906–3.899 | 0.090    |

Univariate and multivariate analysis. Cox proportional hazards regression model. Variables associated with survival by univariate analyses were adopted as covariates in multivariate analyses. Significant P-values are shown in bold font. HR > 1, risk for death increased; HR < 1, risk for death reduced.

**Supplemental table 3** The number of metastatic LNs in UM-UC-3 xenograft mice.

|                     | No. total LNs | No. metastatic LNs | Metastatic ratio (%) |
|---------------------|---------------|--------------------|----------------------|
| sh-Ctrl             | 10            | 5                  | 50.0                 |
| sh- <i>DANCR</i> -1 | 10            | 0                  | 0                    |
| Vector              | 10            | 4                  | 40.0                 |
| <i>DANCR</i>        | 10            | 9                  | 90.0                 |

**Supplementary Table 4. Primers used in this study.**

| <b>Primer Name</b>     | <b>Sequence 5'-3'</b>       |
|------------------------|-----------------------------|
| DANCR Forward          | TCGGAGGTGGATTCTGTTAGG       |
| DANCR Reverse          | TCGGTGTAGCAAGTCTGGTGA       |
| GAPDH Forward          | CAAGGCTGAGAACGGGAAG         |
| GAPDH Reverse          | TGAAGACGCCAGTGGACTC         |
| DANCR(1-350) Forward   | GCCCTTGCCCAGAGTCTTCCCCG     |
| DANCR(1-350) Reverse   | AGGGATAGTTGGCTTAAGTCAATTGAA |
| DANCR(1-700) Forward   | GCCCTTGCCCAGAGTCTTCCCCG     |
| DANCR(1-700) Reverse   | TCCCCCGTGCCACCCAGAGGG       |
| DANCR(320-915) Forward | GTATTTCAATTGACTTAAGCCAATA   |
| DANCR(320-915) Reverse | GTCAGGCCAAGTAAGTTTATTAACCT  |
| DANCR(670-915) Forward | TACACCGAAGCCCTCTGGGTGG      |
| DANCR(670-915) Reverse | GTCAGGCCAAGTAAGTTTATTAACCT  |
| LRPPRC Forward         | GAGAGATGCCGGAATTGAGC        |
| LRPPRC Reverse         | CTCGGACTTCTCCACCTTCT        |
| IL-11 Forward          | TATGGGACAAAGCTGCAAGGT       |
| IL-11 Reverse          | GGTGGCGTTCTATCCACAGAT       |
| PLAU Forward           | CCGCATGACTTTGACTGGAAT       |
| PLAU Reverse           | GCCATTCTCTTCCTTGGTGTG       |
| MMP-9 Forward          | ACGCAGACATCGTCATCCAGT       |
| MMP-9 Reverse          | GGACCACAACCTCGTCATCGTC      |
| CCND1 Forward          | GCTGCGAAGTGGAAACCATC        |
| CCND1 Reverse          | CCTCCTTCTGCACACATTTGAA      |
| U6 Forward             | CTCGCTTCGGCAGCACATATAC      |
| U6 Reverse             | AACGCTTCACGAATTTGCGTGTC     |
| MALAT1 Forward         | GACGGAGGTTGAGATGAAGC        |
| MALAT1 Reverse         | ATTCGGGGCTCTGTAGTCCT        |

**Supplementary Table 5. Sequences of siRNA oligos, shRNAs used in this study.**

| <b>Name</b>  | <b>Sequence 5'-3'</b> |
|--------------|-----------------------|
| <b>siRNA</b> |                       |
| Si-Ctrl      | UUCUCCGAACGUGUCACGUTT |
| Si-DANCR-1   | GAGCUAGAGCAGUGACAAUTT |
| Si-DANCR-2   | GCGUACUAACUUGUAGCAATT |
| Si-LRPPRC    | GGAGGAGCAUUUGAGACAATT |
| <b>shRNA</b> |                       |
| Sh-Ctrl      | CAACAAGATGAAGAGCACCAA |
| Sh-DANCR-1   | AGGAGCTAGAGCAGTGACAAT |

**Supplementary Table 6. The probes used in this study.**

| <b>Probe Name</b>           | <b>Sequence 5'-3'</b>   | <b>Label</b>   |
|-----------------------------|-------------------------|----------------|
| <b>Used in FISH</b>         |                         |                |
| DANCR-1                     | CGCGCAACTCCAGCTGACAA    | 5'- and 3'-CY3 |
| DANCR-2                     | GTGAACATGAAGCACCTGCT    | 5'- and 3'-CY3 |
| DANCR-3                     | TGCCAGGCTTCTCCACCAGT    | 5'- and 3'-CY3 |
| U6- probe                   | CACGAATTTGCGTGTTCATCCTT | 5'- and 3'-CY3 |
| <b>Used in RNA Pulldown</b> |                         |                |
| DANCR-even-1                | CGCCCGAAACCCGCTACATA    | 3'-Biotin      |
| DANCR-even-2                | TGCACTTCCGCAGACGTAAG    | 3'-Biotin      |
| DANCR-even-3                | CTTATTAGAGGCACTTTCCT    | 3'-Biotin      |
| DANCR-even-4                | GTGAACATGAAGCACCTGCT    | 3'-Biotin      |
| DANCR-even-5                | TTGAGTTAGCGGGGGCGGAG    | 3'-Biotin      |
| DANCR-even-6                | GTGCCACCCAGAGGGCTTCG    | 3'-Biotin      |
| DANCR-even-7                | TCATGACCGGCTTACAATAT    | 3'-Biotin      |
| DANCR-even-8                | TGCCAGGCTTCTCCACCAGT    | 3'-Biotin      |
| DANCR-odd-1                 | CGCGCAACTCCAGCTGACAA    | 3'-Biotin      |
| DANCR-odd-2                 | GGAGCTCAAGGTCGGCTGGG    | 3'-Biotin      |
| DANCR-odd-3                 | ACAGGACATTCCAGCTTCAA    | 3'-Biotin      |
| DANCR-odd-4                 | TGTGGCACTGCACGGACACG    | 3'-Biotin      |
| DANCR-odd-5                 | GTCCCTAACAGAATCCACCT    | 3'-Biotin      |
| DANCR-odd-6                 | TATAGCGCCTAGATAACGGT    | 3'-Biotin      |
| DANCR-odd-7                 | ACAAGGGGGTGTAATCCACG    | 3'-Biotin      |
| DANCR-odd-8                 | TTATATGGGGGAGAGAGACC    | 3'-Biotin      |
| LacZ-1                      | CCAGTGAATCCGTAATCATG    | 3'-Biotin      |
| LacZ-2                      | TCACGACGTTGTAAAACGAC    | 3'-Biotin      |
| LacZ-3                      | ATTAAGTTGGGTAACGCCAG    | 3'-Biotin      |
| LacZ-4                      | AGGTTACGTTGGTGTAGATG    | 3'-Biotin      |
| LacZ-5                      | AATGTGAGCGAGTAACAACC    | 3'-Biotin      |
| LacZ-6                      | GTAGCCAGCTTTCATCAACA    | 3'-Biotin      |
| LacZ-7                      | AATAATTCGCGTCTGGCCTT    | 3'-Biotin      |
| LacZ-8                      | AGATGAAACGCCGAGTTAAC    | 3'-Biotin      |



The full-length blots of manuscript are presented.

Figure 5C

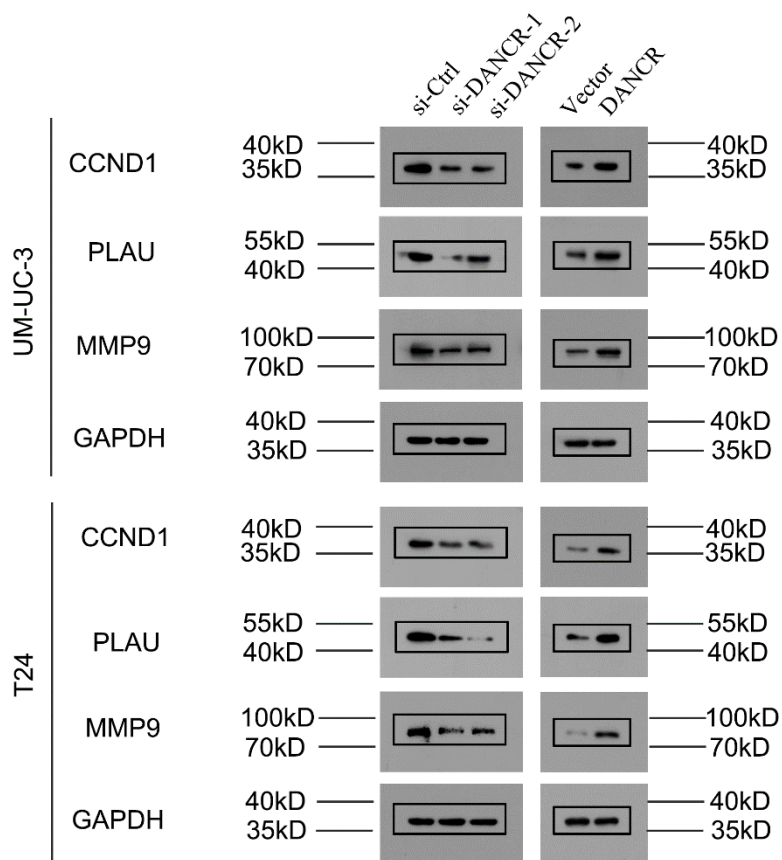

Figure 6C

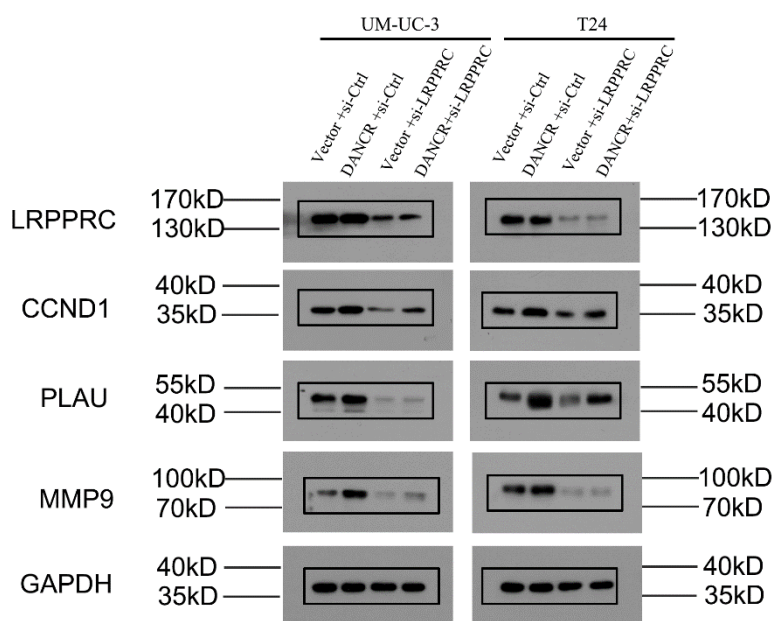



**Figure 7G**

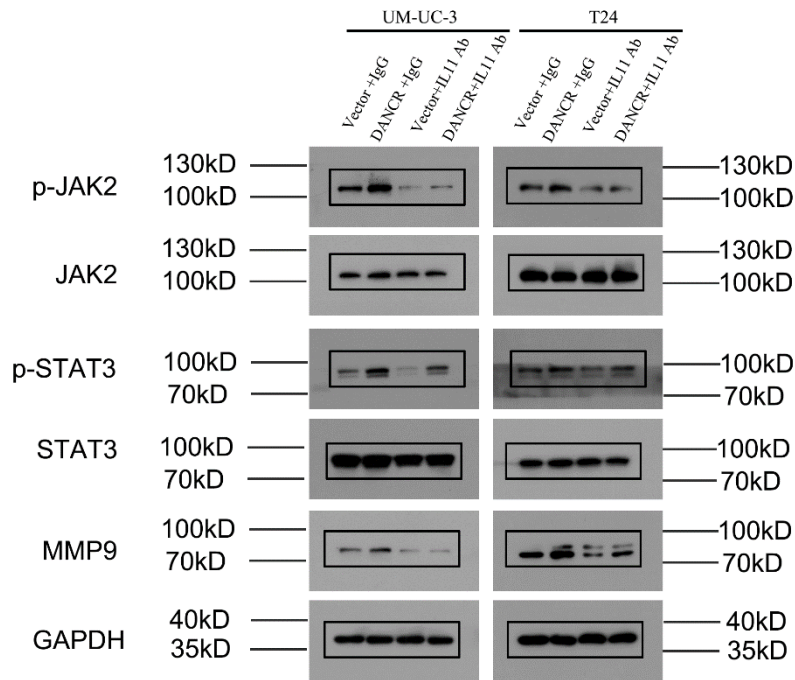

**Figure 7H**

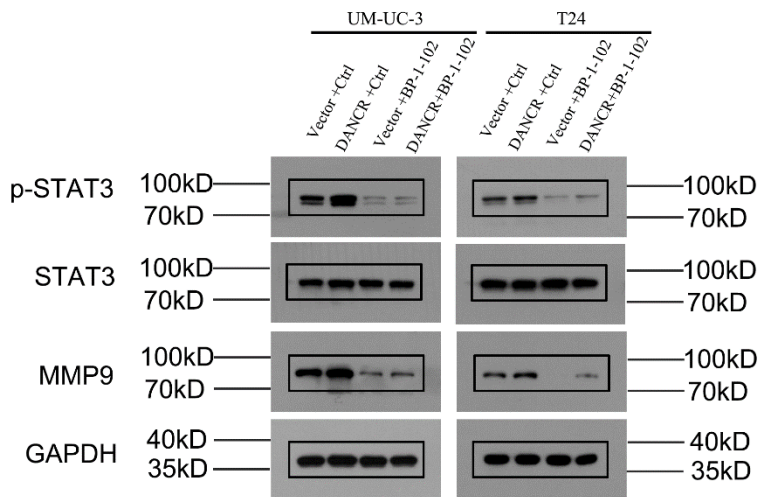

**Figure S1D**

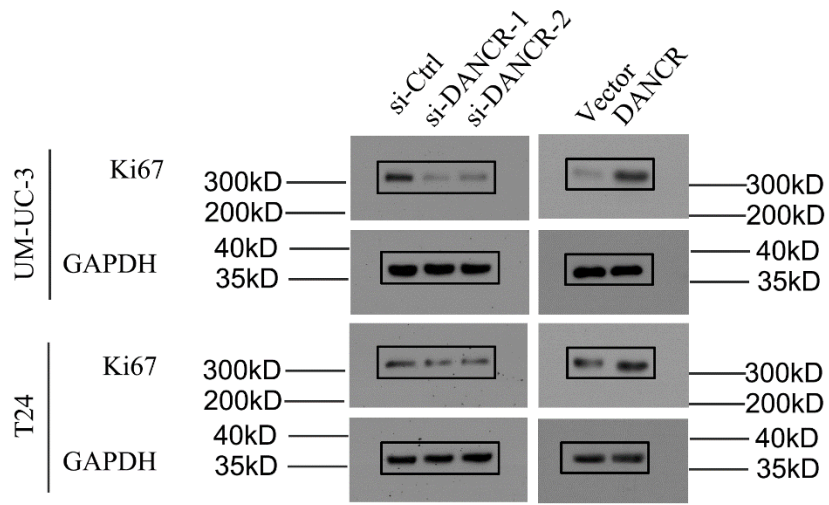

Supplement: mmc1.pdf [file mmc1.pdf]
